# Supplementary figures and images for: The Smile Index: Part 3. A Simple, Prognostic Severity Scale for Unilateral Cleft Palate
Source: PubMed Central journal article supplement — Plast Reconstr Surg Glob Open. 2021 Oct 22;9(10):e3870. doi: 10.1097/GOX.0000000000003870 (PMC8542126; doi:10.1097/gox.0000000000003870), 2021-10-22

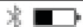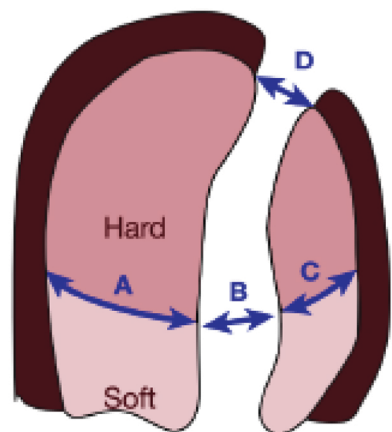

mm

A 15

B

C

D

|   |   |   |
|---|---|---|
| 1 | 2 | 3 |
| 4 | 5 | 6 |
| 7 | 8 | 9 |
| < | 0 | . |

Done

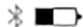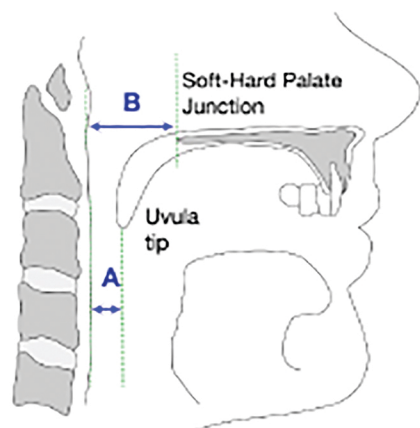

mm

A 15

B

|   |   |   |
|---|---|---|
| 1 | 2 | 3 |
| 4 | 5 | 6 |
| 7 | 8 | 9 |
| < | 0 | . |

Done

Supplement: gox-9-e3870-s001.pdf [file gox-9-e3870-s001.pdf]
